# Supplementary material for: Sandwich structured dielectrics for air-stable and flexible low-voltage organic transistors in ultrasensitive pressure sensing
Source: Royal Society of Chemistry journal article supplement (doi:10.1039/d0qm00062k), 2020-01-01
Supplement: d0qm00062k1.pdf [file d0qm00062k1.pdf]

## Electronic Supplementary Information

### Sandwich Structured Dielectrics for Air-Stable and Flexible Low-Voltage Organic Transistors in Ultrasensitive Pressure Sensing

Yue Jiang<sup>ab</sup>, Ziyang Liu<sup>a</sup>, Zhigang Yin<sup>\*a</sup>, and Qingdong Zheng<sup>\*a</sup>

<sup>a</sup>State Key Laboratory of Structural Chemistry, Fujian Institute of Research on the Structure of Matter, Chinese Academy of Sciences, 155 Yangqiao West Road, Fuzhou, Fujian 350002, China

<sup>b</sup>ShanghaiTech University, 100 Haik Road, Shanghai 201210, China

\*Corresponding authors.

E-mail address: yinzhg@fjirsm.ac.cn (Z. Yin); [qingdongzheng@fjirsm.ac.cn](mailto:qingdongzheng@fjirsm.ac.cn) (Q. Zheng)

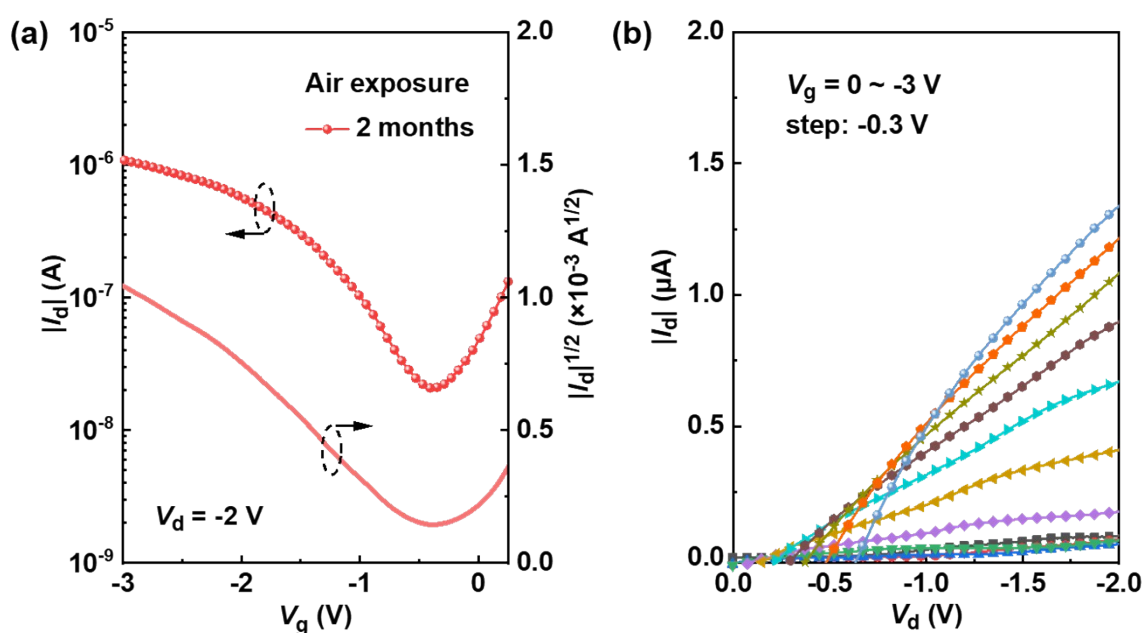

**Fig. S1** (a) Transfer and (b) output characteristics of the flexible OTFT with the Sandwiched-2 dielectric after continuous air exposure for two months.

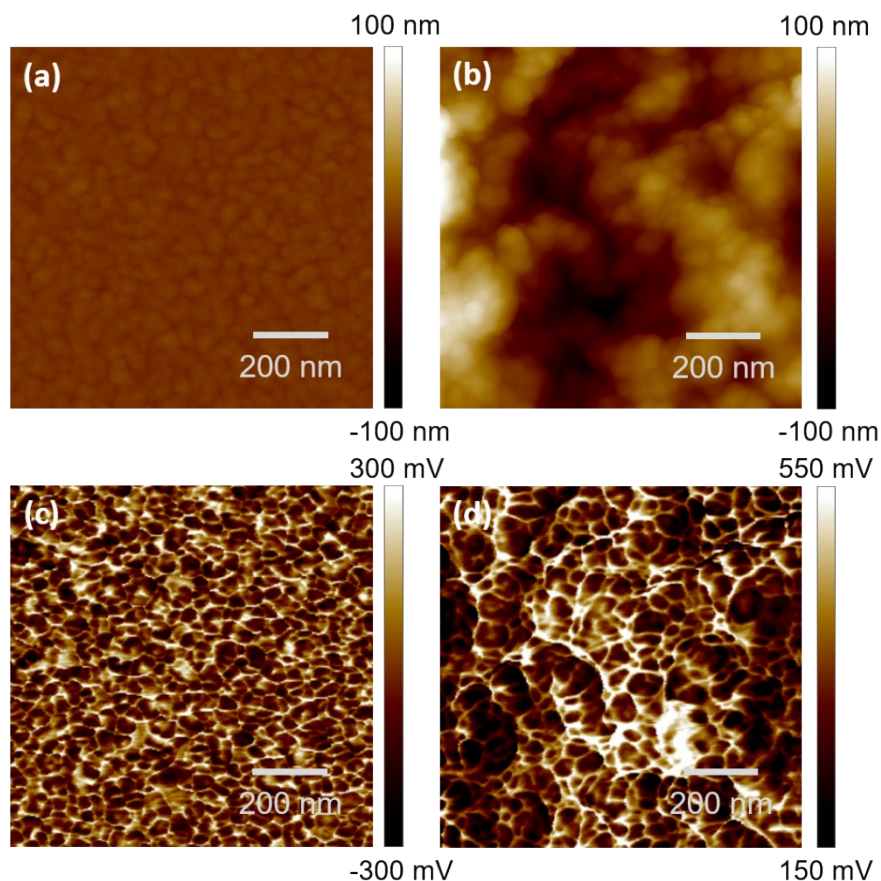

**Fig. S2** Tapping-mode AFM analysis of (a, c) the Au source/drain electrode film (RMS roughness = 2.24 nm) and (b, d) the Au gate electrode film (RMS roughness = 29.9 nm): (a, b) height and (c, d) adhesion images ( $1 \times 1 \mu\text{m}$ ).

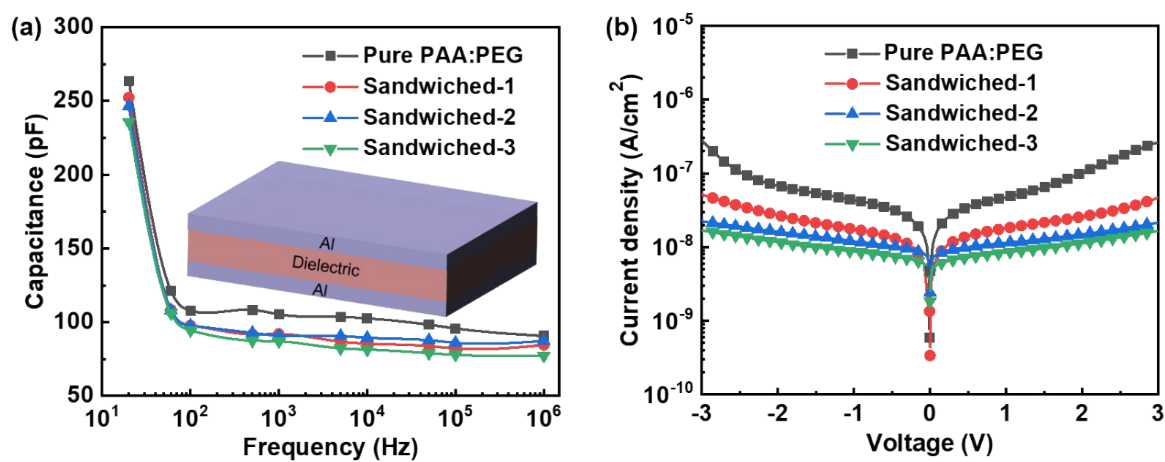

**Fig. S3** (a) Capacitance-frequency characteristics and (b) leakage current density-voltage curves of various polymer dielectric layers in MIM capacitors.

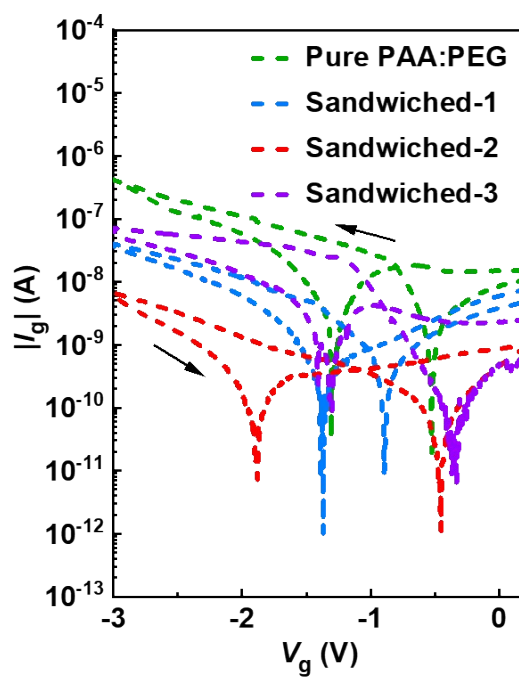

**Fig. S4** Leakage current curves of flexible OTFTs based on various polymer dielectric layers.

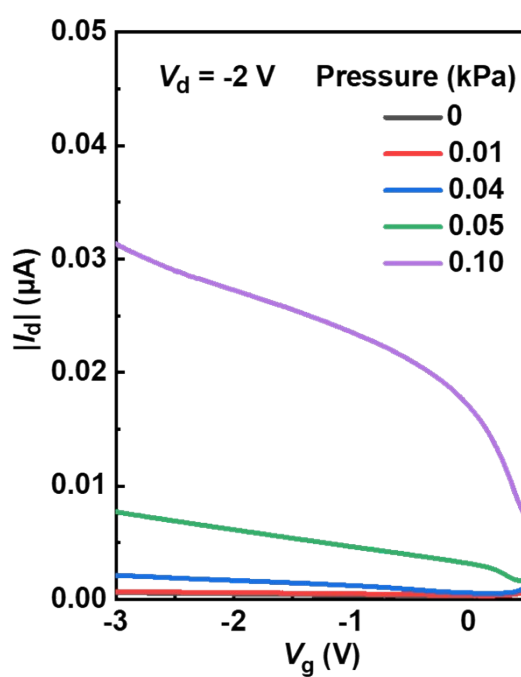

**Fig. S5** Transfer characteristics of the OTFT pressure sensor in the low-pressure region.

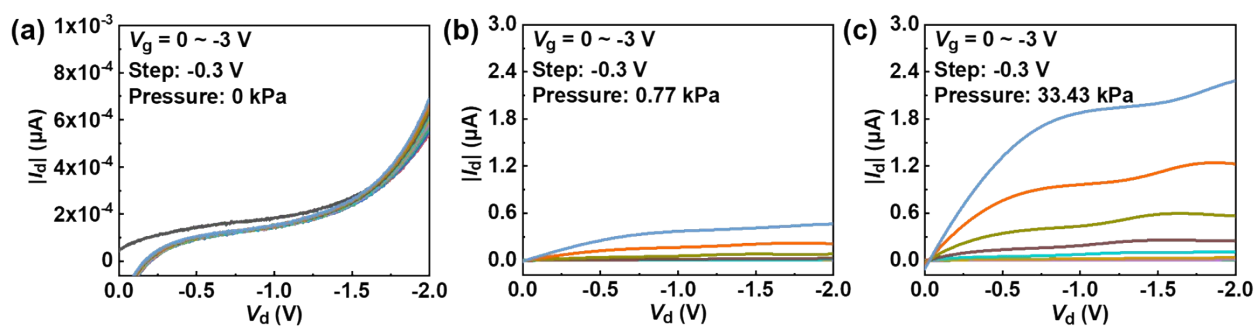

**Fig. S6** Output characteristics of the OTFT pressure sensor under the representative external pressures of (a) 0, (b) 0.77, and (c) 33.43 kPa, respectively.

**Table S1** Contact angle and surface energy data of the semiconductor film and various polymer dielectric films.

| Sample                     | Contact angle ( $^{\circ}$ ) |               | Energy ( $\text{mJ m}^{-2}$ )         |                                  |                                  |
|----------------------------|------------------------------|---------------|---------------------------------------|----------------------------------|----------------------------------|
|                            | DI water                     | Diiodomethane | Dispersive ( $\gamma_d^{\text{sg}}$ ) | Polar ( $\gamma_p^{\text{sg}}$ ) | Surface ( $\gamma_{\text{sg}}$ ) |
| PIDT-BT:TCNQ               | 100.0                        | 53.5          | 32.6                                  | 0.2                              | 32.8                             |
| PIDT-BT:TCNQ/PAA:PEG       | 84.0                         | 45.0          | 34.0                                  | 3.3                              | 37.3                             |
| PIDT-BT:TCNQ/PS/PAA:PEG/PS | 94.0                         | 35.0          | 42.7                                  | 0.2                              | 42.9                             |
| PIDT-BT:TCNQ/PS            | 94.5                         | 37.5          | 41.4                                  | 0.2                              | 41.6                             |
